# Supplementary material for: A Genomic Framework for Evaluating the Impact of Per- and Polyfluoroalkyl Substances on Bone Health
Source: Research Square preprint supplement (doi:10.21203/rs.3.rs-7753007/v1), 2025-10-22
Supplement: Supplementary file 1 [file 44ecc62e05c82c8b9b7d941b.xlsx]

## Sheet: GWAS dataset
Outcome	GWAS ID	n_cases	n_controls
72 kDa type IV collagenase	prot-a-1918	NA	NA
Benign neoplasm of bone and articular cartilage	finn-b-CD2_BENIGN_BONE_CARTILAGE	1190	217602
Benign neoplasm: Bones of skull and face	finn-b-CD2_BENIGN_BONE_SKULL_FACE	120	218672
Benign neoplasm: Long bones of lower limb	finn-b-CD2_BENIGN_BONE_LONG_LOWER	443	218349
Calcium	ukb-b-8951	NA	NA
Calcium	ukb-d-30680_irnt	NA	NA
Calcium	ukb-d-30680_raw	NA	NA
Collagen alpha-1(I) chain	prot-a-618	NA	NA
Collagen alpha-1(VI) chain	prot-a-622	NA	NA
Collagen alpha-1(VIII) chain	prot-a-625	NA	NA
Collagen alpha-1(XV) chain	prot-a-616	NA	NA
Collagen alpha-1(XX) chain	prot-a-619	NA	NA
Collagen alpha-1(XXVIII) chain	prot-a-621	NA	NA
Collagen alpha-2(XI) chain	prot-a-615	NA	NA
Collagenase 3	prot-a-1913	NA	NA
Coxarthrosis [arthrosis of hip](FG)	finn-b-COX_ARTHROSIS	10709	172834
Coxarthrosis, primary	finn-b-M13_ARTHTROSIS_COX_PRIM_ICD10	9700	209092
Coxarthrosis, primary, with hip surgery	finn-b-M13_ARTHTROSIS_COX_PRIM_HIPSURG	6978	209092
Diagnoses - main ICD10: S02 Fracture of skull and facial bones	ukb-d-S02	1351	359843
Diagnoses - main ICD10: S42 Fracture of shoulder and upper arm	ukb-d-S42	1791	359403
Diagnoses - main ICD10: S62 Fracture at wrist and hand level	ukb-d-S62	1763	359431
Diagnoses - main ICD10: S72 Fracture of femur	ukb-d-S72	1803	359391
Diagnoses - main ICD10: S82 Fracture of lower leg, including ankle	ukb-d-S82	4557	356637
Diagnoses - main ICD10: S82.80 Fractures of other parts of lower leg (closed)	ukb-b-5946	1479	461531
Diagnoses - main ICD10: Z47.0 Follow-up care involving removal of fracture plate and other internal fixation device	ukb-b-19542	2730	460280
Diagnoses - secondary ICD10: M81.99 Osteoporosis, unspecified (Site unspecified)	ukb-b-17796	1976	461034
Disorders of continuity of bone	finn-b-M13_BONECONTINUITY	1103	209575
Drug-induced osteoporosis	finn-b-DRUGADVERS_OSTEOPO	124	218668
Drug-induced osteoporosis with pathological fracture	finn-b-OSTPOPATFRACTURE	156	218007
FGF23	prot-c-3807_1_2	NA	NA
Fracture of femur	finn-b-ST19_FRACT_FEMUR	3983	211460
Fracture of lower leg, including ankle	finn-b-ST19_FRACT_LOWER_LEG_INCLU_ANKLE	10489	191178
Fracture of lumbar spine and pelvis	finn-b-ST19_FRACT_LUMBAR_SPINE_PELVIS	2859	212839
Fracture of shoulder and upper arm	finn-b-ST19_FRACT_SHOUL_UPPER_ARM	5824	202866
Fracture of skull and facial bones	finn-b-ST19_FRACT_SKULL_FACIAL_BONES	3467	196254
Fracture resulting from simple fall	ukb-a-332	18864	12898
Fracture resulting from simple fall	ukb-b-15251	26126	17757
Fractured bone site(s): Ankle	ukb-a-438	4693	330853
Fractured bone site(s): Ankle	ukb-b-15582	6479	453861
Fractured bone site(s): Arm	ukb-a-440	3391	332155
Fractured bone site(s): Arm	ukb-b-19255	4714	455626
Fractured bone site(s): Leg	ukb-b-3798	2988	457352
Fractured bone site(s): Other bones	ukb-a-441	17380	318166
Fractured bone site(s): Other bones	ukb-b-17738	24060	436280
Fractured bone site(s): Spine	ukb-b-873	1036	459304
Fractured bone site(s): Wrist	ukb-a-439	6663	328883
Fractured bone site(s): Wrist	ukb-b-9571	9113	451227
Fractured/broken bones in last 5 years	ukb-a-308	32193	303394
Fractured/broken bones in last 5 years	ukb-b-13346	44502	415887
Heel bone mineral density (BMD) (left)	ukb-b-1096	NA	NA
Heel bone mineral density (BMD) (right)	ukb-b-4657	NA	NA
Heel bone mineral density (BMD)	ukb-b-8875	NA	NA
Heel bone mineral density (BMD) T-score automated (left)	ukb-a-361	NA	NA
Heel bone mineral density (BMD) T-score automated (right)	ukb-a-362	NA	NA
Heel bone mineral density (BMD) T-score automated	ukb-a-500	NA	NA
Heel bone mineral density (BMD) T-score, automated (left)	ukb-b-15730	NA	NA
Heel bone mineral density (BMD) T-score, automated (right)	ukb-b-20032	NA	NA
Heel bone mineral density (BMD) T-score, automated	ukb-b-20124	NA	NA
Heel bone mineral density (BMD), manual entry	ukb-b-11364	NA	NA
Heel bone ultrasound T-score, manual entry	ukb-b-17612	NA	NA
Malignant neoplasm of bone and articular cartilage	finn-b-C3_BONE_CARTILAGE	119	218673
Neutrophil collagenase	prot-a-1920	NA	NA
Non-cancer illness code self-reported: osteoarthritis	ukb-a-106	28257	308902
Non-cancer illness code self-reported: osteoporosis	ukb-a-87	5266	331893
Non-cancer illness code, self-reported: fracture wrist / colles fracture	ukb-b-7831	1060	461873
Non-cancer illness code, self-reported: osteoarthritis	ukb-b-14486	38472	424461
Non-cancer illness code, self-reported: osteopenia	ukb-b-19381	1145	461788
Non-cancer illness code, self-reported: osteoporosis	ukb-b-12141	7547	455386
Osteocalcin	prot-a-246	NA	NA
Osteomalacia	finn-b-M13_OSTEOMALACIA	120	209575
Osteomyelitis	finn-b-M13_OSTEOMYELITIS	842	209575
Osteonecrosis	finn-b-M13_OSTEONECROSIS	604	209575
Osteonecrosis due to drugs	finn-b-OSTEON_DRUGS	101	218691
Osteoporosis with pathological fracture (FG)	finn-b-OSTEOPOROSIS_FRACTURE_FG	785	172834
Other secondary coxarthrosis	finn-b-SCND_OTH_COXARTHROSIS	419	208083
Parathyroid hormone	prot-a-2431	NA	NA
Parathyroid hormone/parathyroid hormone-related peptide receptor	prot-a-2429	NA	NA
Parathyroid hormone-related protein	prot-a-2432	NA	NA
Phosphate	ukb-d-30810_irnt	NA	NA
Phosphate	ukb-d-30810_raw	NA	NA
Postmenopausal osteoporosis with pathological fracture	finn-b-OSTPOPATFRCTURE_POSTEMENO	621	122861
Primary coxarthrosis, bilateral	finn-b-PRIM_COXARTHROSIS	4163	208083
Procollagen C-endopeptidase enhancer 1	prot-a-2209	NA	NA
Procollagen C-endopeptidase enhancer 2	prot-a-2210	NA	NA
Procollagen galactosyltransferase 1	prot-a-631	NA	NA
Procollagen galactosyltransferase 2	prot-a-632	NA	NA
Procollagen-lysine,2-oxoglutarate 5-dioxygenase 2	prot-a-2304	NA	NA
Procollagen-lysine,2-oxoglutarate 5-dioxygenase 3	prot-a-2305	NA	NA

## Sheet: Heterogeneity
Exposure	Outcome	Heterogeneity
		MR Egger			Inverse variance weighted
		Q	Q_df	Q_pval	Q	Q_df	Q_pval
PFOA	72 kDa type IV collagenase || id:prot-a-1918	24.485	22	0.322328	24.8631	23	0.357384
PFOA	Benign neoplasm of bone and articular cartilage || id:finn-b-CD2_BENIGN_BONE_CARTILAGE	51.5625	36	0.0448044	52.1586	37	0.0503224
PFOA	Benign neoplasm: Bones of skull and face || id:finn-b-CD2_BENIGN_BONE_SKULL_FACE	25.8452	36	0.89467	26.5138	37	0.899444
PFOA	Benign neoplasm: Long bones of lower limb || id:finn-b-CD2_BENIGN_BONE_LONG_LOWER	46.8689	36	0.106073	47.129	37	0.122933
PFOA	Calcium || id:ukb-b-8951	19.3449	20	0.499517	21.3176	21	0.439703
PFOA	Calcium || id:ukb-d-30680_irnt	56.7556	35	0.0114385	56.7625	36	0.0151625
PFOA	Calcium || id:ukb-d-30680_raw	53.9293	35	0.0214069	54.0005	36	0.0273869
PFOA	Collagen alpha-1(I) chain || id:prot-a-618	12.5436	22	0.945114	13.0011	23	0.951965
PFOA	Collagen alpha-1(VI) chain || id:prot-a-622	21.7663	22	0.473907	22.1566	23	0.510815
PFOA	Collagen alpha-1(VIII) chain || id:prot-a-625	22.1437	22	0.451341	22.1449	23	0.511519
PFOA	Collagen alpha-1(XV) chain || id:prot-a-616	33.9363	22	0.0498611	34.2708	23	0.0613433
PFOA	Collagen alpha-1(XX) chain || id:prot-a-619	19.2461	22	0.630087	19.4463	23	0.675041
PFOA	Collagen alpha-1(XXVIII) chain || id:prot-a-621	37.5903	22	0.020358	38.7172	23	0.0213052
PFOA	Collagen alpha-2(XI) chain || id:prot-a-615	21.7485	22	0.474983	21.7503	23	0.535366
PFOA	Collagenase 3 || id:prot-a-1913	17.3053	22	0.746289	18.1378	23	0.749971
PFOA	Coxarthrosis [arthrosis of hip](FG) || id:finn-b-COX_ARTHROSIS	45.3818	36	0.135864	45.6692	37	0.155167
PFOA	Coxarthrosis, primary || id:finn-b-M13_ARTHTROSIS_COX_PRIM_ICD10	51.9598	36	0.0414335	54.1176	37	0.034302
PFOA	Coxarthrosis, primary, with hip surgery || id:finn-b-M13_ARTHTROSIS_COX_PRIM_HIPSURG	55.9835	36	0.0179761	56.3562	37	0.0216479
PFOA	Diagnoses - main ICD10: S02 Fracture of skull and facial bones || id:ukb-d-S02	9.39559	19	0.966316	13.5332	20	0.853352
PFOA	Diagnoses - main ICD10: S42 Fracture of shoulder and upper arm || id:ukb-d-S42	22.5208	20	0.312934	22.5358	21	0.369221
PFOA	Diagnoses - main ICD10: S62 Fracture at wrist and hand level || id:ukb-d-S62	11.8106	20	0.922441	13.5157	21	0.889491
PFOA	Diagnoses - main ICD10: S72 Fracture of femur || id:ukb-d-S72	34.1494	20	0.0251318	34.5963	21	0.0312517
PFOA	Diagnoses - main ICD10: S82 Fracture of lower leg, including ankle || id:ukb-d-S82	21.1457	27	0.779418	21.1922	28	0.817243
PFOA	Diagnoses - main ICD10: S82.80 Fractures of other parts of lower leg (closed) || id:ukb-b-5946	2.04939	3	0.562219	2.62956	4	0.621596
PFOA	Diagnoses - main ICD10: Z47.0 Follow-up care involving removal of fracture plate and other internal fixation device || id:ukb-b-19542	1.34531	5	0.930201	5.28923	6	0.507288
PFOA	Diagnoses - secondary ICD10: M81.99 Osteoporosis, unspecified (Site unspecified) || id:ukb-b-17796	6.27749	3	0.0988631	8.08839	4	0.0883934
PFOA	Disorders of continuity of bone || id:finn-b-M13_BONECONTINUITY	39.4459	36	0.318505	39.4839	37	0.359534
PFOA	Drug-induced osteoporosis || id:finn-b-DRUGADVERS_OSTEOPO	34.9389	36	0.518917	35.0411	37	0.561164
PFOA	Drug-induced osteoporosis with pathological fracture || id:finn-b-OSTPOPATFRACTURE	36.7517	36	0.433877	36.7581	37	0.480279
PFOA	FGF23 || id:prot-c-3807_1_2	0.356046	1	0.550711	2.86488	2	0.238726
PFOA	Fracture of femur || id:finn-b-ST19_FRACT_FEMUR	24.2091	36	0.93294	26.1442	37	0.908634
PFOA	Fracture of lower leg, including ankle || id:finn-b-ST19_FRACT_LOWER_LEG_INCLU_ANKLE	31.7624	36	0.670395	31.7871	37	0.71175
PFOA	Fracture of lumbar spine and pelvis || id:finn-b-ST19_FRACT_LUMBAR_SPINE_PELVIS	49.5216	36	0.0661235	50.5348	37	0.0681409
PFOA	Fracture of shoulder and upper arm || id:finn-b-ST19_FRACT_SHOUL_UPPER_ARM	40.0114	36	0.296595	41.0658	37	0.296923
PFOA	Fracture of skull and facial bones || id:finn-b-ST19_FRACT_SKULL_FACIAL_BONES	44.5166	36	0.155966	45.1387	37	0.168342
PFOA	Fracture resulting from simple fall || id:ukb-a-332	33.7009	33	0.433409	34.3478	34	0.451083
PFOA	Fracture resulting from simple fall || id:ukb-b-15251	18.7578	17	0.342612	18.8388	18	0.401815
PFOA	Fractured bone site(s): Ankle || id:ukb-a-438	36.6305	33	0.304	36.8016	34	0.340441
PFOA	Fractured bone site(s): Ankle || id:ukb-b-15582	8.07029	10	0.621971	8.08354	11	0.705802
PFOA	Fractured bone site(s): Arm || id:ukb-a-440	35.2552	33	0.361956	36.3356	34	0.360358
PFOA	Fractured bone site(s): Arm || id:ukb-b-19255	5.5319	8	0.699503	5.89542	9	0.750338
PFOA	Fractured bone site(s): Leg || id:ukb-b-3798	2.02568	5	0.845581	2.16454	6	0.903961
PFOA	Fractured bone site(s): Other bones || id:ukb-a-441	50.2352	33	0.0277852	50.8047	34	0.0319628
PFOA	Fractured bone site(s): Other bones || id:ukb-b-17738	28.6292	17	0.0381024	28.6605	18	0.0526888
PFOA	Fractured bone site(s): Spine || id:ukb-b-873	NA	NA	NA	0.376458	1	0.539505
PFOA	Fractured bone site(s): Wrist || id:ukb-a-439	30.0372	33	0.6154	30.3559	34	0.646939
PFOA	Fractured bone site(s): Wrist || id:ukb-b-9571	20.3942	13	0.0858079	21.214	14	0.0962732
PFOA	Fractured/broken bones in last 5 years || id:ukb-a-308	43.33	33	0.107664	45.7228	34	0.0863349
PFOA	Fractured/broken bones in last 5 years || id:ukb-b-13346	24.7219	19	0.169901	25.0667	20	0.198891
PFOA	Heel bone mineral density (BMD) (left) || id:ukb-b-1096	41.9145	23	0.00928896	41.9146	24	0.0131919
PFOA	Heel bone mineral density (BMD) (right) || id:ukb-b-4657	41.8126	23	0.00954576	41.8402	24	0.0134466
PFOA	Heel bone mineral density (BMD) || id:ukb-b-8875	31.7457	23	0.105549	42.5454	24	0.0112038
PFOA	Heel bone mineral density (BMD) T-score automated (left) || id:ukb-a-361	44.1365	33	0.0931884	44.6874	34	0.103877
PFOA	Heel bone mineral density (BMD) T-score automated (right) || id:ukb-a-362	47.8914	33	0.0452933	47.8974	34	0.0573929
PFOA	Heel bone mineral density (BMD) T-score automated || id:ukb-a-500	41.3806	33	0.150137	43.0493	34	0.13739
PFOA	Heel bone mineral density (BMD) T-score, automated (left) || id:ukb-b-15730	42.8763	23	0.00716323	42.8764	24	0.010275
PFOA	Heel bone mineral density (BMD) T-score, automated (right) || id:ukb-b-20032	42.0673	23	0.00891601	42.0914	24	0.0126039
PFOA	Heel bone mineral density (BMD) T-score, automated || id:ukb-b-20124	32.7947	23	0.0847122	42.9113	24	0.0101815
PFOA	Heel bone mineral density (BMD), manual entry || id:ukb-b-11364	23.2143	19	0.228035	23.426	20	0.268363
PFOA	Heel bone ultrasound T-score, manual entry || id:ukb-b-17612	15.558	19	0.686535	17.3149	20	0.632442
PFOA	Malignant neoplasm of bone and articular cartilage || id:finn-b-C3_BONE_CARTILAGE	17.1115	36	0.996791	18.5292	37	0.995151
PFOA	Neutrophil collagenase || id:prot-a-1920	18.0089	22	0.70546	18.0248	23	0.756145
PFOA	Non-cancer illness code self-reported: osteoarthritis || id:ukb-a-106	43.6323	33	0.102038	44.729	34	0.10312
PFOA	Non-cancer illness code self-reported: osteoporosis || id:ukb-a-87	30.4794	33	0.593215	31.0731	34	0.611842
PFOA	Non-cancer illness code, self-reported: fracture wrist / colles fracture || id:ukb-b-7831	3.55126	1	0.0595004	4.74301	2	0.0933403
PFOA	Non-cancer illness code, self-reported: osteoarthritis || id:ukb-b-14486	31.1405	19	0.038962	32.5781	20	0.0375146
PFOA	Non-cancer illness code, self-reported: osteopenia || id:ukb-b-19381	0.201282	2	0.904258	3.71527	3	0.293897
PFOA	Non-cancer illness code, self-reported: osteoporosis || id:ukb-b-12141	9.13447	12	0.691404	9.54016	13	0.731035
PFOA	Osteocalcin || id:prot-a-246	22.1401	22	0.451553	29.333	23	0.16952
PFOA	Osteomalacia || id:finn-b-M13_OSTEOMALACIA	29.3845	36	0.774377	32.0985	37	0.697985
PFOA	Osteomyelitis || id:finn-b-M13_OSTEOMYELITIS	46.7663	36	0.107943	48.0033	37	0.106303
PFOA	Osteonecrosis || id:finn-b-M13_OSTEONECROSIS	35.7963	36	0.478206	36.058	37	0.513037
PFOA	Osteonecrosis due to drugs || id:finn-b-OSTEON_DRUGS	55.5102	36	0.0199086	55.7288	37	0.0246861
PFOA	Osteoporosis with pathological fracture (FG) || id:finn-b-OSTEOPOROSIS_FRACTURE_FG	33.8578	36	0.570867	33.9421	37	0.613182
PFOA	Other secondary coxarthrosis || id:finn-b-SCND_OTH_COXARTHROSIS	26.9809	36	0.861483	28.9093	37	0.826471
PFOA	Parathyroid hormone || id:prot-a-2431	33.9435	22	0.0497772	34.2812	23	0.0612002
PFOA	Parathyroid hormone/parathyroid hormone-related peptide receptor || id:prot-a-2429	16.1154	22	0.810119	16.619	23	0.827521
PFOA	Parathyroid hormone-related protein || id:prot-a-2432	16.441	22	0.793412	18.1687	23	0.748275
PFOA	Phosphate || id:ukb-d-30810_irnt	61.2413	35	0.00394958	62.9136	36	0.00362038
PFOA	Phosphate || id:ukb-d-30810_raw	60.0105	35	0.00532966	61.6566	36	0.00491038
PFOA	Postmenopausal osteoporosis with pathological fracture || id:finn-b-OSTPOPATFRCTURE_POSTEMENO	33.5584	36	0.585271	33.6286	37	0.627899
PFOA	Primary coxarthrosis, bilateral || id:finn-b-PRIM_COXARTHROSIS	42.2887	36	0.217847	43.2394	37	0.222225
PFOA	Procollagen C-endopeptidase enhancer 1 || id:prot-a-2209	34.225	22	0.0465964	34.2615	23	0.0614709
PFOA	Procollagen C-endopeptidase enhancer 2 || id:prot-a-2210	38.3229	22	0.0168507	38.7932	23	0.0209025
PFOA	Procollagen galactosyltransferase 1 || id:prot-a-631	11.344	22	0.969488	11.4022	23	0.978697
PFOA	Procollagen galactosyltransferase 2 || id:prot-a-632	29.9647	22	0.119325	29.9647	23	0.150417
PFOA	Procollagen-lysine,2-oxoglutarate 5-dioxygenase 2 || id:prot-a-2304	20.9907	22	0.521313	21.144	23	0.572294
PFOA	Procollagen-lysine,2-oxoglutarate 5-dioxygenase 3 || id:prot-a-2305	23.5013	22	0.373902	23.6645	23	0.422574
PFOS	Malignant neoplasm of bone and articular cartilage || id:finn-b-C3_BONE_CARTILAGE	56.0121	46	0.148042	56.1408	47	0.169641
PFOS	Benign neoplasm of bone and articular cartilage || id:finn-b-CD2_BENIGN_BONE_CARTILAGE	44.8933	46	0.518586	47.7909	47	0.440437
PFOS	Benign neoplasm: Long bones of lower limb || id:finn-b-CD2_BENIGN_BONE_LONG_LOWER	32.9992	46	0.924796	33.913	47	0.923627
PFOS	Benign neoplasm: Bones of skull and face || id:finn-b-CD2_BENIGN_BONE_SKULL_FACE	35.4807	46	0.869201	38.6494	47	0.801904
PFOS	Coxarthrosis [arthrosis of hip](FG) || id:finn-b-COX_ARTHROSIS	48.2686	46	0.381314	48.2718	47	0.421253
PFOS	Drug-induced osteoporosis || id:finn-b-DRUGADVERS_OSTEOPO	41.2435	46	0.671445	41.5108	47	0.69858
PFOS	Coxarthrosis, primary, with hip surgery || id:finn-b-M13_ARTHTROSIS_COX_PRIM_HIPSURG	56.5146	46	0.137709	56.928	47	0.152128
PFOS	Coxarthrosis, primary || id:finn-b-M13_ARTHTROSIS_COX_PRIM_ICD10	47.8204	46	0.398708	48.0321	47	0.430779
PFOS	Disorders of continuity of bone || id:finn-b-M13_BONECONTINUITY	45.6226	46	0.487966	45.6405	47	0.528936
PFOS	Osteomalacia || id:finn-b-M13_OSTEOMALACIA	44.2004	46	0.547884	44.983	47	0.556464
PFOS	Osteomyelitis || id:finn-b-M13_OSTEOMYELITIS	37.6419	46	0.805077	47.0016	47	0.472495
PFOS	Osteonecrosis || id:finn-b-M13_OSTEONECROSIS	46.4966	46	0.451805	47.2346	47	0.462969
PFOS	Osteonecrosis due to drugs || id:finn-b-OSTEON_DRUGS	45.4021	46	0.49719	47.5694	47	0.449371
PFOS	Osteoporosis with pathological fracture (FG) || id:finn-b-OSTEOPOROSIS_FRACTURE_FG	55.7809	46	0.152988	55.8278	47	0.176999
PFOS	Drug-induced osteoporosis with pathological fracture || id:finn-b-OSTPOPATFRACTURE	52.0179	46	0.25117	52.253	47	0.277242
PFOS	Postmenopausal osteoporosis with pathological fracture || id:finn-b-OSTPOPATFRCTURE_POSTEMENO	59.968	46	0.0809875	60.0724	47	0.0954851
PFOS	Primary coxarthrosis, bilateral || id:finn-b-PRIM_COXARTHROSIS	46.2056	46	0.463766	49.1816	47	0.385833
PFOS	Other secondary coxarthrosis || id:finn-b-SCND_OTH_COXARTHROSIS	38.6987	46	0.768874	38.7031	47	0.800144
PFOS	Fracture of femur || id:finn-b-ST19_FRACT_FEMUR	35.1578	46	0.877543	35.1923	47	0.897539
PFOS	Fracture of lower leg, including ankle || id:finn-b-ST19_FRACT_LOWER_LEG_INCLU_ANKLE	35.8677	46	0.858765	35.8805	47	0.881404
PFOS	Fracture of lumbar spine and pelvis || id:finn-b-ST19_FRACT_LUMBAR_SPINE_PELVIS	55.1297	46	0.167578	55.6794	47	0.180567
PFOS	Fracture of shoulder and upper arm || id:finn-b-ST19_FRACT_SHOUL_UPPER_ARM	47.0238	46	0.43038	47.3269	47	0.459208
PFOS	Fracture of skull and facial bones || id:finn-b-ST19_FRACT_SKULL_FACIAL_BONES	38.7737	46	0.766197	38.9919	47	0.790546
PFOS	Collagenase 3 || id:prot-a-1913	16.8849	25	0.885926	17.1734	26	0.90375
PFOS	72 kDa type IV collagenase || id:prot-a-1918	14.6329	25	0.949547	15.4875	26	0.947755
PFOS	Neutrophil collagenase || id:prot-a-1920	23.8761	25	0.526541	23.9072	26	0.58127
PFOS	Procollagen C-endopeptidase enhancer 1 || id:prot-a-2209	20.6428	25	0.712348	20.6949	26	0.757537
PFOS	Procollagen C-endopeptidase enhancer 2 || id:prot-a-2210	19.4484	25	0.775129	19.7059	26	0.805284
PFOS	Procollagen-lysine,2-oxoglutarate 5-dioxygenase 2 || id:prot-a-2304	28.8539	25	0.270071	29.0231	26	0.310031
PFOS	Procollagen-lysine,2-oxoglutarate 5-dioxygenase 3 || id:prot-a-2305	27.7479	25	0.319587	27.7813	26	0.369304
PFOS	Parathyroid hormone/parathyroid hormone-related peptide receptor || id:prot-a-2429	28.1705	25	0.300062	28.2075	26	0.348326
PFOS	Parathyroid hormone || id:prot-a-2431	23.5718	25	0.544212	23.6466	26	0.596168
PFOS	Parathyroid hormone-related protein || id:prot-a-2432	34.7945	25	0.0919877	36.1935	26	0.0881672
PFOS	Osteocalcin || id:prot-a-246	20.8709	25	0.699784	20.8736	26	0.74846
PFOS	Collagen alpha-2(XI) chain || id:prot-a-615	16.8947	25	0.885579	16.9559	26	0.910409
PFOS	Collagen alpha-1(XV) chain || id:prot-a-616	20.8576	25	0.700525	20.8804	26	0.748113
PFOS	Collagen alpha-1(I) chain || id:prot-a-618	28.3466	25	0.292147	28.3591	26	0.34102
PFOS	Collagen alpha-1(XX) chain || id:prot-a-619	19.6445	25	0.765215	19.7579	26	0.80289
PFOS	Collagen alpha-1(XXVIII) chain || id:prot-a-621	14.7028	25	0.948057	14.7957	26	0.960957
PFOS	Collagen alpha-1(VI) chain || id:prot-a-622	25.0718	25	0.458356	25.2081	26	0.507224
PFOS	Collagen alpha-1(VIII) chain || id:prot-a-625	15.39	25	0.931789	15.9126	26	0.938282
PFOS	Procollagen galactosyltransferase 1 || id:prot-a-631	15.5137	25	0.928543	20.0344	26	0.789925
PFOS	Procollagen galactosyltransferase 2 || id:prot-a-632	36.8572	25	0.0595624	37.8572	26	0.0624343
PFOS	FGF23 || id:prot-c-3807_1_2	2.23627	3	0.52484	2.24139	4	0.691459
PFOS	Non-cancer illness code self-reported: osteoarthritis || id:ukb-a-106	51.7156	39	0.0835868	52.178	40	0.0939907
PFOS	Fractured/broken bones in last 5 years || id:ukb-a-308	50.6907	39	0.0994851	61.3059	40	0.0166892
PFOS	Fracture resulting from simple fall || id:ukb-a-332	35.8877	39	0.612617	35.9051	40	0.655119
PFOS	Heel bone mineral density (BMD) T-score automated (left) || id:ukb-a-361	54.6438	39	0.0493346	55.5652	40	0.0518164
PFOS	Heel bone mineral density (BMD) T-score automated (right) || id:ukb-a-362	50.6465	39	0.100221	51.9066	40	0.0983334
PFOS	Fractured bone site(s): Ankle || id:ukb-a-438	50.711	39	0.0991476	50.7371	40	0.118935
PFOS	Fractured bone site(s): Wrist || id:ukb-a-439	53.3436	39	0.0626823	56.4425	40	0.0440046
PFOS	Fractured bone site(s): Arm || id:ukb-a-440	39.037	39	0.468216	40.8433	40	0.433243
PFOS	Fractured bone site(s): Other bones || id:ukb-a-441	46.8561	39	0.181317	53.4659	40	0.0754589
PFOS	Heel bone mineral density (BMD) T-score automated || id:ukb-a-500	85.7296	39	2.34e-05	87.6242	40	2.06e-05
PFOS	Non-cancer illness code self-reported: osteoporosis || id:ukb-a-87	60.1914	39	0.0162493	60.8977	40	0.0181756
PFOS	Heel bone mineral density (BMD) (left) || id:ukb-b-1096	27.4757	26	0.384729	28.8632	27	0.367562
PFOS	Heel bone mineral density (BMD), manual entry || id:ukb-b-11364	18.4731	24	0.779476	19.0992	25	0.792338
PFOS	Non-cancer illness code, self-reported: osteoporosis || id:ukb-b-12141	2.9771	8	0.935787	4.14889	9	0.901342
PFOS	Fractured/broken bones in last 5 years || id:ukb-b-13346	30.6997	25	0.199157	38.3953	26	0.0556274
PFOS	Non-cancer illness code, self-reported: osteoarthritis || id:ukb-b-14486	41.5488	23	0.0102415	41.5783	24	0.0143801
PFOS	Fracture resulting from simple fall || id:ukb-b-15251	18.7856	20	0.535797	20.086	21	0.51582
PFOS	Fractured bone site(s): Ankle || id:ukb-b-15582	3.73222	7	0.810052	4.00218	8	0.856927
PFOS	Heel bone mineral density (BMD) T-score, automated (left) || id:ukb-b-15730	27.8208	26	0.367335	29.159	27	0.353231
PFOS	Heel bone ultrasound T-score, manual entry || id:ukb-b-17612	20.9035	24	0.64441	21.3217	25	0.674544
PFOS	Fractured bone site(s): Other bones || id:ukb-b-17738	17.4924	20	0.62081	17.7648	21	0.663838
PFOS	Fractured bone site(s): Arm || id:ukb-b-19255	5.1046	6	0.530469	6.03501	7	0.535667
PFOS	Diagnoses - main ICD10: Z47.0 Follow-up care involving removal of fracture plate and other internal fixation device || id:ukb-b-19542	0.579139	1	0.44665	4.74512	2	0.0932416
PFOS	Heel bone mineral density (BMD) T-score, automated (right) || id:ukb-b-20032	29.4774	26	0.289826	30.9347	27	0.273827
PFOS	Heel bone mineral density (BMD) T-score, automated || id:ukb-b-20124	55.4791	28	0.00148813	59.0118	29	0.000818437
PFOS	Fractured bone site(s): Leg || id:ukb-b-3798	0.285826	1	0.592908	0.757581	2	0.684689
PFOS	Heel bone mineral density (BMD) (right) || id:ukb-b-4657	28.8618	26	0.317405	30.1023	27	0.309578
PFOS	Heel bone mineral density (BMD) || id:ukb-b-8875	54.4642	28	0.00197093	57.7038	29	0.00118186
PFOS	Calcium || id:ukb-b-8951	18.6889	26	0.849291	20.7267	27	0.798919
PFOS	Fractured bone site(s): Wrist || id:ukb-b-9571	15.4973	11	0.160843	15.5687	12	0.211801
PFOS	Calcium || id:ukb-d-30680_irnt	42.4315	39	0.325369	43.655	40	0.318859
PFOS	Calcium || id:ukb-d-30680_raw	40.7779	39	0.392186	41.7664	40	0.39396
PFOS	Phosphate || id:ukb-d-30810_irnt	37.1407	39	0.554915	37.1409	40	0.599683
PFOS	Phosphate || id:ukb-d-30810_raw	37.578	39	0.534745	37.5787	40	0.579794
PFOS	Diagnoses - main ICD10: S02 Fracture of skull and facial bones || id:ukb-d-S02	13.1035	22	0.930236	15.9553	23	0.857175
PFOS	Diagnoses - main ICD10: S42 Fracture of shoulder and upper arm || id:ukb-d-S42	21.9563	25	0.638266	21.996	26	0.688915
PFOS	Diagnoses - main ICD10: S62 Fracture at wrist and hand level || id:ukb-d-S62	12.6994	25	0.979977	14.6434	26	0.963512
PFOS	Diagnoses - main ICD10: S72 Fracture of femur || id:ukb-d-S72	17.8814	25	0.847383	18.0353	26	0.874487
PFOS	Diagnoses - main ICD10: S82 Fracture of lower leg, including ankle || id:ukb-d-S82	52.7612	32	0.0118671	57.6314	33	0.00502109

## Sheet: Pleiotropy
Exposure	Outcome	Pleiotropy
		MR_Egger		MR PRESSO Global
		intercept	pval	pval
PFOA	72 kDa type IV collagenase || id:prot-a-1918	-0.0103156	0.565952	0.368
PFOA	Benign neoplasm of bone and articular cartilage || id:finn-b-CD2_BENIGN_BONE_CARTILAGE	0.0155527	0.522938	0.084
PFOA	Benign neoplasm: Bones of skull and face || id:finn-b-CD2_BENIGN_BONE_SKULL_FACE	-0.0508371	0.418892	0.898
PFOA	Benign neoplasm: Long bones of lower limb || id:finn-b-CD2_BENIGN_BONE_LONG_LOWER	0.0167344	0.657556	0.135
PFOA	Calcium || id:ukb-b-8951	-1.07295	0.17551	0.425
PFOA	Calcium || id:ukb-d-30680_irnt	-0.0198607	0.948362	0.067
PFOA	Calcium || id:ukb-d-30680_raw	-0.00598761	0.831053	0.072
PFOA	Collagen alpha-1(I) chain || id:prot-a-618	-0.0113473	0.505827	0.955
PFOA	Collagen alpha-1(VI) chain || id:prot-a-622	-0.0104808	0.538586	0.519
PFOA	Collagen alpha-1(VIII) chain || id:prot-a-625	-0.0005856	0.972559	0.499
PFOA	Collagen alpha-1(XV) chain || id:prot-a-616	-0.00970083	0.646074	0.117
PFOA	Collagen alpha-1(XX) chain || id:prot-a-619	-0.00750647	0.658948	0.687
PFOA	Collagen alpha-1(XXVIII) chain || id:prot-a-621	-0.0178098	0.425415	0.085
PFOA	Collagen alpha-2(XI) chain || id:prot-a-615	0.000711771	0.96654	0.523
PFOA	Collagenase 3 || id:prot-a-1913	0.015307	0.371446	0.77
PFOA	Coxarthrosis [arthrosis of hip](FG) || id:finn-b-COX_ARTHROSIS	-0.00406157	0.635927	0.147
PFOA	Coxarthrosis, primary || id:finn-b-M13_ARTHTROSIS_COX_PRIM_ICD10	-0.0114384	0.229383	0.086
PFOA	Coxarthrosis, primary, with hip surgery || id:finn-b-M13_ARTHTROSIS_COX_PRIM_HIPSURG	-0.00552679	0.627405	0.074
PFOA	Diagnoses - main ICD10: S02 Fracture of skull and facial bones || id:ukb-d-S02	-0.045188	0.0561419	0.847
PFOA	Diagnoses - main ICD10: S42 Fracture of shoulder and upper arm || id:ukb-d-S42	0.0030289	0.909265	0.383
PFOA	Diagnoses - main ICD10: S62 Fracture at wrist and hand level || id:ukb-d-S62	-0.0318769	0.206443	0.884
PFOA	Diagnoses - main ICD10: S72 Fracture of femur || id:ukb-d-S72	0.0166865	0.614531	0.083
PFOA	Diagnoses - main ICD10: S82 Fracture of lower leg, including ankle || id:ukb-d-S82	-0.00615404	0.830765	0.817
PFOA	Diagnoses - main ICD10: S82.80 Fractures of other parts of lower leg (closed) || id:ukb-b-5946	-0.112802	0.501651	0.653
PFOA	Diagnoses - main ICD10: Z47.0 Follow-up care involving removal of fracture plate and other internal fixation device || id:ukb-b-19542	-0.184239	0.103788	0.506
PFOA	Diagnoses - secondary ICD10: M81.99 Osteoporosis, unspecified (Site unspecified) || id:ukb-b-17796	-0.230158	0.420846	0.139
PFOA	Disorders of continuity of bone || id:finn-b-M13_BONECONTINUITY	0.00407557	0.853172	0.371
PFOA	Drug-induced osteoporosis || id:finn-b-DRUGADVERS_OSTEOPO	-0.0197044	0.751084	0.549
PFOA	Drug-induced osteoporosis with pathological fracture || id:finn-b-OSTPOPATFRACTURE	-0.00437897	0.937401	0.538
PFOA	FGF23 || id:prot-c-3807_1_2	0.171872	0.35851	NA
PFOA	Fracture of femur || id:finn-b-ST19_FRACT_FEMUR	0.0157801	0.172732	0.905
PFOA	Fracture of lower leg, including ankle || id:finn-b-ST19_FRACT_LOWER_LEG_INCLU_ANKLE	0.00111091	0.876068	0.737
PFOA	Fracture of lumbar spine and pelvis || id:finn-b-ST19_FRACT_LUMBAR_SPINE_PELVIS	0.0132119	0.396448	0.097
PFOA	Fracture of shoulder and upper arm || id:finn-b-ST19_FRACT_SHOUL_UPPER_ARM	-0.00953905	0.33656	0.256
PFOA	Fracture of skull and facial bones || id:finn-b-ST19_FRACT_SKULL_FACIAL_BONES	-0.00936008	0.482741	0.15
PFOA	Fracture resulting from simple fall || id:ukb-a-332	0.294912	0.431762	0.435
PFOA	Fracture resulting from simple fall || id:ukb-b-15251	0.152606	0.789697	0.385
PFOA	Fractured bone site(s): Ankle || id:ukb-a-438	0.011585	0.697128	0.339
PFOA	Fractured bone site(s): Ankle || id:ukb-b-15582	0.00688275	0.910668	0.695
PFOA	Fractured bone site(s): Arm || id:ukb-a-440	0.0248006	0.32191	0.372
PFOA	Fractured bone site(s): Arm || id:ukb-b-19255	-0.0363494	0.563258	0.767
PFOA	Fractured bone site(s): Leg || id:ukb-b-3798	-0.0363637	0.724686	0.891
PFOA	Fractured bone site(s): Other bones || id:ukb-a-441	0.0399016	0.544953	0.08
PFOA	Fractured bone site(s): Other bones || id:ukb-b-17738	0.0137789	0.893039	0.108
PFOA	Fractured bone site(s): Spine || id:ukb-b-873	NA	NA	NA
PFOA	Fractured bone site(s): Wrist || id:ukb-a-439	0.0187711	0.576181	0.677
PFOA	Fractured bone site(s): Wrist || id:ukb-b-9571	0.0531393	0.482549	0.101
PFOA	Fractured/broken bones in last 5 years || id:ukb-a-308	0.108624	0.186226	0.103
PFOA	Fractured/broken bones in last 5 years || id:ukb-b-13346	0.0527759	0.612639	0.188
PFOA	Heel bone mineral density (BMD) (left) || id:ukb-b-1096	0.00388428	0.994388	0.073
PFOA	Heel bone mineral density (BMD) (right) || id:ukb-b-4657	0.0670037	0.902936	0.063
PFOA	Heel bone mineral density (BMD) || id:ukb-b-8875	0.980418	0.0102351	0.067
PFOA	Heel bone mineral density (BMD) T-score automated (left) || id:ukb-a-361	0.303035	0.525464	0.116
PFOA	Heel bone mineral density (BMD) T-score automated (right) || id:ukb-a-362	0.0315731	0.948892	0.098
PFOA	Heel bone mineral density (BMD) T-score automated || id:ukb-a-500	0.392128	0.256958	0.103
PFOA	Heel bone mineral density (BMD) T-score, automated (left) || id:ukb-b-15730	-0.00383044	0.99453	0.057
PFOA	Heel bone mineral density (BMD) T-score, automated (right) || id:ukb-b-20032	0.0626442	0.90948	0.065
PFOA	Heel bone mineral density (BMD) T-score, automated || id:ukb-b-20124	0.949132	0.0138743	0.062
PFOA	Heel bone mineral density (BMD), manual entry || id:ukb-b-11364	0.457229	0.681867	0.267
PFOA	Heel bone ultrasound T-score, manual entry || id:ukb-b-17612	1.33575	0.20073	0.642
PFOA	Malignant neoplasm of bone and articular cartilage || id:finn-b-C3_BONE_CARTILAGE	-0.0752479	0.241578	0.997
PFOA	Neutrophil collagenase || id:prot-a-1920	0.00211228	0.90095	0.743
PFOA	Non-cancer illness code self-reported: osteoarthritis || id:ukb-a-106	-0.0688996	0.369047	0.106
PFOA	Non-cancer illness code self-reported: osteoporosis || id:ukb-a-87	0.0226507	0.446493	0.623
PFOA	Non-cancer illness code, self-reported: fracture wrist / colles fracture || id:ukb-b-7831	-0.552702	0.665738	NA
PFOA	Non-cancer illness code, self-reported: osteoarthritis || id:ukb-b-14486	0.10016	0.360743	0.095
PFOA	Non-cancer illness code, self-reported: osteopenia || id:ukb-b-19381	-0.507164	0.201698	0.352
PFOA	Non-cancer illness code, self-reported: osteoporosis || id:ukb-b-12141	-0.0350098	0.536126	0.729
PFOA	Osteocalcin || id:prot-a-246	-0.0449958	0.0138797	0.19
PFOA	Osteomalacia || id:finn-b-M13_OSTEOMALACIA	0.103871	0.108177	0.666
PFOA	Osteomyelitis || id:finn-b-M13_OSTEOMYELITIS	0.0265139	0.335676	0.115
PFOA	Osteonecrosis || id:finn-b-M13_OSTEONECROSIS	-0.0144769	0.612079	0.551
PFOA	Osteonecrosis due to drugs || id:finn-b-OSTEON_DRUGS	-0.0321617	0.708733	0.079
PFOA	Osteoporosis with pathological fracture (FG) || id:finn-b-OSTEOPOROSIS_FRACTURE_FG	0.00736026	0.773216	0.633
PFOA	Other secondary coxarthrosis || id:finn-b-SCND_OTH_COXARTHROSIS	-0.0467389	0.173461	0.846
PFOA	Parathyroid hormone || id:prot-a-2431	-0.00974819	0.644529	0.102
PFOA	Parathyroid hormone/parathyroid hormone-related peptide receptor || id:prot-a-2429	0.0119049	0.485378	0.828
PFOA	Parathyroid hormone-related protein || id:prot-a-2432	-0.0220512	0.202246	0.764
PFOA	Phosphate || id:ukb-d-30810_irnt	0.303412	0.33497	0.051
PFOA	Phosphate || id:ukb-d-30810_raw	0.048346	0.33391	0.052
PFOA	Postmenopausal osteoporosis with pathological fracture || id:finn-b-OSTPOPATFRCTURE_POSTEMENO	0.00749392	0.792544	0.66
PFOA	Primary coxarthrosis, bilateral || id:finn-b-PRIM_COXARTHROSIS	-0.011038	0.374296	0.214
PFOA	Procollagen C-endopeptidase enhancer 1 || id:prot-a-2209	0.00320533	0.879659	0.105
PFOA	Procollagen C-endopeptidase enhancer 2 || id:prot-a-2210	0.0115001	0.608548	0.068
PFOA	Procollagen galactosyltransferase 1 || id:prot-a-631	0.0040482	0.811574	0.977
PFOA	Procollagen galactosyltransferase 2 || id:prot-a-632	8.86e-05	0.996429	0.153
PFOA	Procollagen-lysine,2-oxoglutarate 5-dioxygenase 2 || id:prot-a-2304	0.00656911	0.699167	0.576
PFOA	Procollagen-lysine,2-oxoglutarate 5-dioxygenase 3 || id:prot-a-2305	0.00677905	0.69963	0.417
PFOS	72 kDa type IV collagenase || id:prot-a-1918	0.0141614	0.3641	0.92
PFOS	Benign neoplasm of bone and articular cartilage || id:finn-b-CD2_BENIGN_BONE_CARTILAGE	-0.0415968	0.0954585	0.469
PFOS	Benign neoplasm: Bones of skull and face || id:finn-b-CD2_BENIGN_BONE_SKULL_FACE	-0.134623	0.0816645	0.783
PFOS	Benign neoplasm: Long bones of lower limb || id:finn-b-CD2_BENIGN_BONE_LONG_LOWER	-0.0380625	0.344118	0.906
PFOS	Calcium || id:ukb-b-8951	0.902146	0.165333	0.775
PFOS	Calcium || id:ukb-d-30680_irnt	-0.309792	0.295464	0.346
PFOS	Calcium || id:ukb-d-30680_raw	-0.0261351	0.336881	0.409
PFOS	Collagen alpha-1(I) chain || id:prot-a-618	-0.00171141	0.91728	0.356
PFOS	Collagen alpha-1(VI) chain || id:prot-a-622	0.00565491	0.715519	0.515
PFOS	Collagen alpha-1(VIII) chain || id:prot-a-625	-0.0110741	0.476425	0.953
PFOS	Collagen alpha-1(XV) chain || id:prot-a-616	-0.00231307	0.881179	0.788
PFOS	Collagen alpha-1(XX) chain || id:prot-a-619	0.0051563	0.739187	0.815
PFOS	Collagen alpha-1(XXVIII) chain || id:prot-a-621	-0.00466849	0.763052	0.969
PFOS	Collagen alpha-2(XI) chain || id:prot-a-615	-0.00379006	0.806578	0.93
PFOS	Collagenase 3 || id:prot-a-1913	0.00822837	0.595921	0.931
PFOS	Coxarthrosis [arthrosis of hip](FG) || id:finn-b-COX_ARTHROSIS	0.000520586	0.95602	0.421
PFOS	Coxarthrosis, primary || id:finn-b-M13_ARTHTROSIS_COX_PRIM_ICD10	-0.00433479	0.653894	0.463
PFOS	Coxarthrosis, primary, with hip surgery || id:finn-b-M13_ARTHTROSIS_COX_PRIM_HIPSURG	0.00705775	0.564702	0.168
PFOS	Diagnoses - main ICD10: S02 Fracture of skull and facial bones || id:ukb-d-S02	0.0491479	0.105394	0.858
PFOS	Diagnoses - main ICD10: S42 Fracture of shoulder and upper arm || id:ukb-d-S42	-0.00396434	0.843703	0.742
PFOS	Diagnoses - main ICD10: S62 Fracture at wrist and hand level || id:ukb-d-S62	0.0273877	0.175499	0.961
PFOS	Diagnoses - main ICD10: S72 Fracture of femur || id:ukb-d-S72	-0.00787784	0.698207	0.847
PFOS	Diagnoses - main ICD10: S82 Fracture of lower leg, including ankle || id:ukb-d-S82	0.0672346	0.0953385	0.057
PFOS	Diagnoses - main ICD10: Z47.0 Follow-up care involving removal of fracture plate and other internal fixation device || id:ukb-b-19542	-0.318039	0.290022	NA
PFOS	Disorders of continuity of bone || id:finn-b-M13_BONECONTINUITY	0.00338885	0.894068	0.552
PFOS	Drug-induced osteoporosis || id:finn-b-DRUGADVERS_OSTEOPO	-0.0386361	0.607646	0.697
PFOS	Drug-induced osteoporosis with pathological fracture || id:finn-b-OSTPOPATFRACTURE	-0.0321486	0.650572	0.274
PFOS	FGF23 || id:prot-c-3807_1_2	0.00865055	0.947445	0.732
PFOS	Fracture of femur || id:finn-b-ST19_FRACT_FEMUR	0.00255368	0.853543	0.901
PFOS	Fracture of lower leg, including ankle || id:finn-b-ST19_FRACT_LOWER_LEG_INCLU_ANKLE	-0.000971183	0.910298	0.867
PFOS	Fracture of lumbar spine and pelvis || id:finn-b-ST19_FRACT_LUMBAR_SPINE_PELVIS	-0.0118283	0.501646	0.193
PFOS	Fracture of shoulder and upper arm || id:finn-b-ST19_FRACT_SHOUL_UPPER_ARM	0.00619688	0.588731	0.473
PFOS	Fracture of skull and facial bones || id:finn-b-ST19_FRACT_SKULL_FACIAL_BONES	-0.0067291	0.642586	0.796
PFOS	Fracture resulting from simple fall || id:ukb-a-332	-0.0554033	0.895813	0.64
PFOS	Fracture resulting from simple fall || id:ukb-b-15251	-0.806647	0.267621	0.503
PFOS	Fractured bone site(s): Ankle || id:ukb-a-438	-0.00522602	0.888119	0.127
PFOS	Fractured bone site(s): Ankle || id:ukb-b-15582	-0.0500709	0.619381	0.862
PFOS	Fractured bone site(s): Arm || id:ukb-a-440	0.0370566	0.18692	0.458
PFOS	Fractured bone site(s): Arm || id:ukb-b-19255	0.0814182	0.372007	0.557
PFOS	Fractured bone site(s): Leg || id:ukb-b-3798	-0.112572	0.616856	NA
PFOS	Fractured bone site(s): Other bones || id:ukb-a-441	0.157081	0.0241801	0.085
PFOS	Fractured bone site(s): Other bones || id:ukb-b-17738	0.0534077	0.607453	0.671
PFOS	Fractured bone site(s): Wrist || id:ukb-a-439	0.0676351	0.140329	0.087
PFOS	Fractured bone site(s): Wrist || id:ukb-b-9571	-0.0244958	0.826069	0.237
PFOS	Fractured/broken bones in last 5 years || id:ukb-a-308	0.264396	0.00681051	0.067
PFOS	Fractured/broken bones in last 5 years || id:ukb-b-13346	0.200959	0.0191971	0.09
PFOS	Heel bone mineral density (BMD) (left) || id:ukb-b-1096	-0.475745	0.262288	0.401
PFOS	Heel bone mineral density (BMD) (right) || id:ukb-b-4657	-0.447694	0.300183	0.386
PFOS	Heel bone mineral density (BMD) || id:ukb-b-8875	-0.536976	0.207424	0.057
PFOS	Heel bone mineral density (BMD) T-score automated (left) || id:ukb-a-361	-0.449351	0.422318	0.071
PFOS	Heel bone mineral density (BMD) T-score automated (right) || id:ukb-a-362	-0.521999	0.33067	0.126
PFOS	Heel bone mineral density (BMD) T-score automated || id:ukb-a-500	-0.483361	0.358917	NA
PFOS	Heel bone mineral density (BMD) T-score, automated (left) || id:ukb-b-15730	-0.467364	0.273652	0.392
PFOS	Heel bone mineral density (BMD) T-score, automated (right) || id:ukb-b-20032	-0.48515	0.267235	0.328
PFOS	Heel bone mineral density (BMD) T-score, automated || id:ukb-b-20124	-0.560892	0.192543	0.051
PFOS	Heel bone mineral density (BMD), manual entry || id:ukb-b-11364	0.620323	0.436523	0.81
PFOS	Heel bone ultrasound T-score, manual entry || id:ukb-b-17612	0.514033	0.524007	0.717
PFOS	Malignant neoplasm of bone and articular cartilage || id:finn-b-C3_BONE_CARTILAGE	0.0275391	0.746549	0.108
PFOS	Neutrophil collagenase || id:prot-a-1920	0.00270203	0.861393	0.643
PFOS	Non-cancer illness code self-reported: osteoarthritis || id:ukb-a-106	0.0516949	0.558275	0.105
PFOS	Non-cancer illness code self-reported: osteoporosis || id:ukb-a-87	0.0285503	0.502704	0.066
PFOS	Non-cancer illness code, self-reported: osteoarthritis || id:ukb-b-14486	-0.0112827	0.899317	0.084
PFOS	Non-cancer illness code, self-reported: osteoporosis || id:ukb-b-12141	-0.103141	0.310578	0.896
PFOS	Osteocalcin || id:prot-a-246	-0.000786623	0.959452	0.772
PFOS	Osteomalacia || id:finn-b-M13_OSTEOMALACIA	-0.0677864	0.380954	0.491
PFOS	Osteomyelitis || id:finn-b-M13_OSTEOMYELITIS	0.088418	0.00369275	0.462
PFOS	Osteonecrosis || id:finn-b-M13_OSTEONECROSIS	-0.0294053	0.39728	0.495
PFOS	Osteonecrosis due to drugs || id:finn-b-OSTEON_DRUGS	-0.12367	0.147787	0.44
PFOS	Osteoporosis with pathological fracture (FG) || id:finn-b-OSTEOPOROSIS_FRACTURE_FG	-0.00665801	0.844973	0.178
PFOS	Other secondary coxarthrosis || id:finn-b-SCND_OTH_COXARTHROSIS	-0.00271587	0.947208	0.805
PFOS	Parathyroid hormone || id:prot-a-2431	0.0041883	0.786773	0.645
PFOS	Parathyroid hormone/parathyroid hormone-related peptide receptor || id:prot-a-2429	-0.00294295	0.857821	0.365
PFOS	Parathyroid hormone-related protein || id:prot-a-2432	0.0181177	0.32566	0.11
PFOS	Phosphate || id:ukb-d-30810_irnt	0.00447029	0.987105	0.611
PFOS	Phosphate || id:ukb-d-30810_raw	-0.00119485	0.978541	0.614
PFOS	Postmenopausal osteoporosis with pathological fracture || id:finn-b-OSTPOPATFRCTURE_POSTEMENO	-0.0110761	0.778482	0.125
PFOS	Primary coxarthrosis, bilateral || id:finn-b-PRIM_COXARTHROSIS	0.0236553	0.0919188	0.422
PFOS	Procollagen C-endopeptidase enhancer 1 || id:prot-a-2209	0.00349581	0.821343	0.747
PFOS	Procollagen C-endopeptidase enhancer 2 || id:prot-a-2210	-0.00777324	0.616274	0.832
PFOS	Procollagen galactosyltransferase 1 || id:prot-a-631	-0.032568	0.0435417	0.765
PFOS	Procollagen galactosyltransferase 2 || id:prot-a-632	-0.0153167	0.41796	0.093
PFOS	Procollagen-lysine,2-oxoglutarate 5-dioxygenase 2 || id:prot-a-2304	-0.00630207	0.704965	0.351
PFOS	Procollagen-lysine,2-oxoglutarate 5-dioxygenase 3 || id:prot-a-2305	-0.00279758	0.863777	0.385
